# Supplementary material for: In Situ Growth of CuWO4 Nanospheres over Graphene Oxide for Photoelectrochemical (PEC) Immunosensing of Clinical Biomarker
Source: MDPI journal article supplement (doi:10.3390/s20010148), 2019-12-25
Supplement: s1 [file s1]

# Supplementary Data

## In situ growth of $\text{CuWO}_4$ nanospheres over graphene oxide for photoelectrochemical (PEC) immunosensing of clinical biomarker

### Figure S1

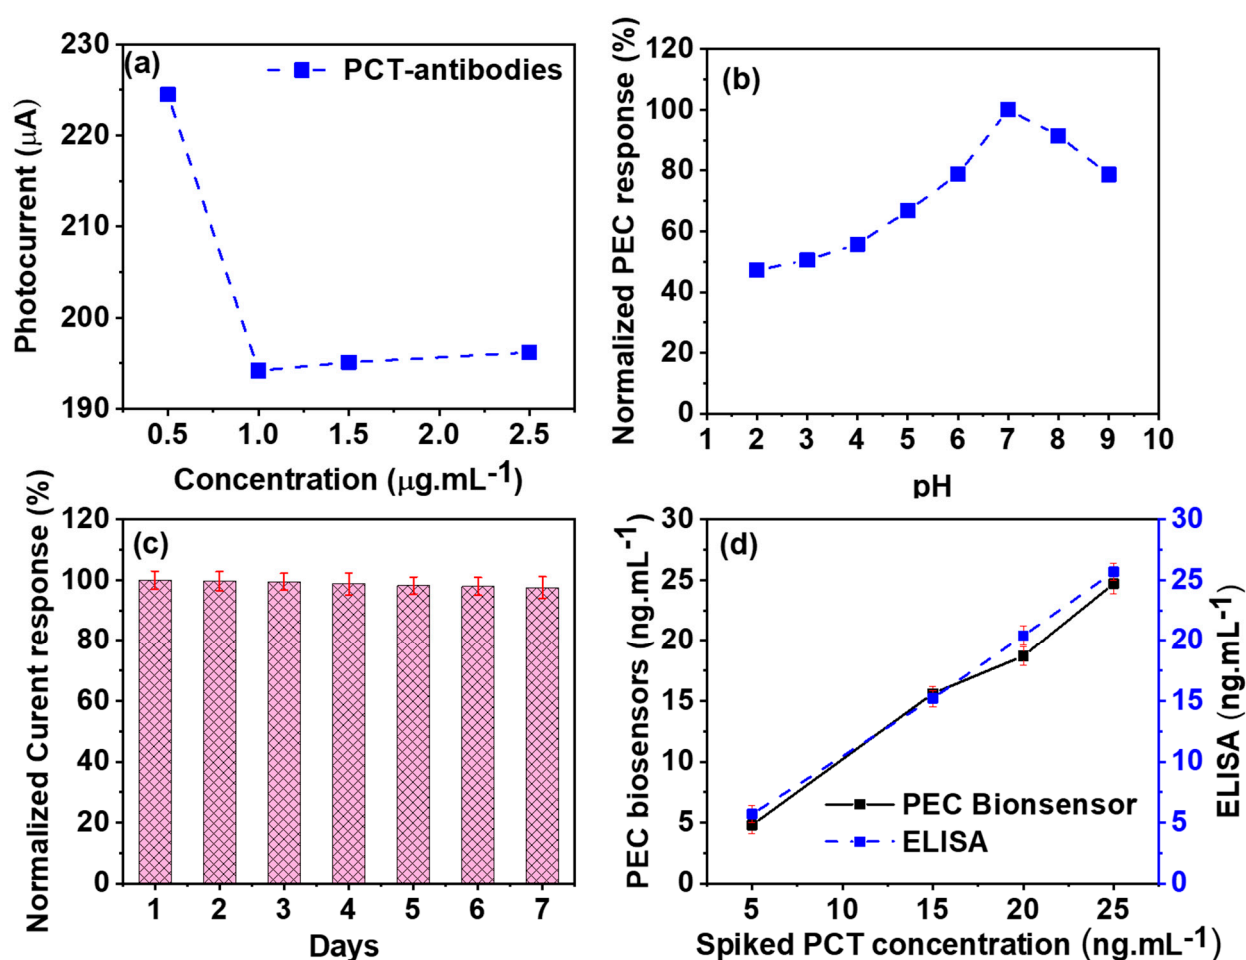

**Figure S1.** (a) photocurrent optimization of  $\text{Ab}_1/\text{CuWO}_4/\text{rGO}/\text{GCE}$  against different concentration of PCT-antibodies, (b) variation of  $\text{CuWO}_4/\text{rGO}/\text{GCE}$  photocurrent against different pH of AA, (c) shelf-life evaluation of devised electrode during 1 week of measurement, (d) the comparison of the PCT concentration measured using designed PEC sensor and standard ELISA within simulated blood plasma (SBP).
